# Supplementary material
Source: HighWire-hosted journal article supplement (https://erj.ersjournals.com/content/58/1/2003677)
Supplement: inline-supplementary-material-1 [file inline-supplementary-material-1.pdf]

## Supplementary material

**Supplementary Table S1. The main symptoms of COVID-19 patients with 3-month follow-up.**

| <b>Variables*</b>                               | <b>Total<br/>(N=647)</b> | <b>Non-severe<br/>(N=399)</b> | <b>Severe<br/>(N=248)</b> | <b>P</b> |
|-------------------------------------------------|--------------------------|-------------------------------|---------------------------|----------|
| Age, year                                       | 58 (15)                  | 55 (15)                       | 63 (13)                   | <0.001   |
| Gender, male, n (%)                             | 287 (44)                 | 165 (41)                      | 122 (49)                  | 0.051    |
| SOFA score                                      | 1 (0-2)                  | 0 (0-1)                       | 2 (1-3)                   | <0.001   |
| <b>Comorbidities, N (%)</b>                     |                          |                               |                           |          |
| Hypertension                                    | 191 (30)                 | 104 (26)                      | 87 (35)                   | 0.015    |
| Diabetes                                        | 70 (11)                  | 41 (10)                       | 29 (12)                   | 0.572    |
| CRD                                             | 36 (6)                   | 17 (4)                        | 19 (8)                    | 0.067    |
| CHD                                             | 33 (5)                   | 19 (5)                        | 14 (6)                    | 0.620    |
| Tumor                                           | 19 (3)                   | 14 (4)                        | 5 (2)                     | 0.274    |
| Arrhythmia                                      | 11 (2)                   | 8 (2)                         | 3 (1)                     | 0.545    |
| <b>Symptoms at three-month follow-up, N (%)</b> |                          |                               |                           |          |
| Weakness                                        | 87 (13)                  | 41 (10)                       | 46 (19)                   | 0.003    |
| Palpitation                                     | 63 (10)                  | 29 (7)                        | 34 (14)                   | 0.007    |
| Dyspnea                                         | 56 (9)                   | 26 (7)                        | 30 (12)                   | 0.014    |
| Cough                                           | 38 (6)                   | 20 (5)                        | 18 (7)                    | 0.238    |
| Lower limb edema                                | 8 (1)                    | 4 (1)                         | 4 (2)                     | 0.490    |

|            |         |         |       |       |
|------------|---------|---------|-------|-------|
| Chest pain | 6 (1)   | 3 (1)   | 3 (1) | 0.680 |
| Hemoptysis | 1 (0.2) | 1 (0.3) | 0 (0) | 1.000 |

---

**Abbreviations:** SOFA, Sequential Organ Failure Assessment; CRD, Chronic Respiratory Disease; CHD, Chronic Heart Disease.

\* Continuous variables were summarized as mean (SD) or median (interquartile ranges [IQR]) where appropriate and categorical variables were number (percentage).

**Supplementary Table S2. The characteristics in COVID-19 patients with or without sequelae at three-month follow-up.**

| <b>Variables</b>                                 | <b>Total<br/>(N=647)</b> | <b>No sequelae<br/>(N=509)</b> | <b>With sequelae<br/>(N=138)</b> | <b>P</b> |
|--------------------------------------------------|--------------------------|--------------------------------|----------------------------------|----------|
| <b>Demographics and clinical characteristics</b> |                          |                                |                                  |          |
| Age, year                                        | 58 (15)                  | 58±15                          | 60±15                            | 0.120    |
| Gender, male, n (%)                              | 287 (44)                 | 230 (45)                       | 57 (41)                          | 0.416    |
| SOFA score                                       | 1 (0-2)                  | 1(0-2)                         | 1 (0-2)                          | 0.662    |
| BMI, kg/m <sup>2</sup>                           | 23.87±3.18               | 24.07±3.33                     | 23.06±2.47                       | 0.229    |
| Severity                                         |                          |                                |                                  | <0.001*  |
| Severe                                           | 248(38)                  | 177(35)                        | 71(51)                           |          |
| Non-severe                                       | 399(62)                  | 332(65)                        | 67(49)                           |          |
| <b>Comorbidities, n (%)</b>                      |                          |                                |                                  |          |
| Hypertension                                     | 191(30)                  | 150 (30)                       | 41 (30)                          | 0.956    |
| Diabetes                                         | 70 (11)                  | 57 (11)                        | 13 (9)                           | 0.551    |
| CRD                                              | 36 (6)                   | 27 (5)                         | 9 (7)                            | 0.580    |
| CHD                                              | 33 (5)                   | 30 (6)                         | 3 (2)                            | 0.078    |
| Tumor                                            | 19 (3)                   | 16 (3)                         | 3 (2)                            | 0.777    |
| Arrhythmia                                       | 11(2)                    | 9 (2)                          | 2 (1)                            | 1.000    |
| <b>Laboratory findings on admission</b>          |                          |                                |                                  |          |
| WBC, 10 <sup>9</sup> /L                          | 4.98 (3.80-6.28)         | 4.90 (3.78-6.20)               | 5.27 (3.87-6.79)                 | 0.045*   |
| Lymphocyte, 10 <sup>9</sup> /L                   | 0.90 (0.65-1.22)         | 0.91 (0.66-1.22)               | 0.88 (0.64-1.22)                 | 0.521    |

|                              |                       |                       |                       |        |
|------------------------------|-----------------------|-----------------------|-----------------------|--------|
| HCRP, mg/L                   | 33.31 (8.71-83.79)    | 30.09 (7.53-79.85)    | 48.21 (13.05-100.33)  | 0.009* |
| NT-proBNP, pg/mL             | 286.40 (95.80-566.55) | 278.20 (95.90-553.20) | 312.90 (90.68-705.53) | 0.160  |
| CK-MB, U/L                   | 10.45 (7.70-13.60)    | 10.45 (7.54-13.46)    | 10.52 (8.05-14.06)    | 0.445  |
| D-dimer, mg/L                | 0.40 (0.31-0.62)      | 0.40(0.31-0.58)       | 0.45(0.31-0.92)       | 0.006* |
| Fibrinogen, g/L              | 3.91(2.96-4.69)       | 3.81(2.96-4.69)       | 3.91(3.01-4.69)       | 0.450  |
| Platelet, 10 <sup>9</sup> /L | 187(179-285)          | 186(140-231)          | 191(147-247)          | 0.227  |

#### Laboratory findings on discharge

|                                |                   |                   |                   |        |
|--------------------------------|-------------------|-------------------|-------------------|--------|
| WBC, 10 <sup>9</sup> /L        | 5.23 (4.21-6.35)  | 5.17 (4.25-6.28)  | 5.38 (4.05-6.68)  | 0.576  |
| Lymphocyte, 10 <sup>9</sup> /L | 1.30 (1.00-1.59)  | 1.31 (1.01-1.61)  | 1.26 (0.91-1.58)  | 0.126  |
| HCRP, mg/L                     | 4.03 (1.37-15.53) | 3.99 (1.32-15.53) | 4.36 (1.61-15.32) | 0.742  |
| D-dimer, mg/L                  | 0.41 (0.29-0.73)  | 0.41 (0.29-0.73)  | 0.43 (0.30-0.73)  | 0.411  |
| Fibrinogen, g/L                | 3.20 (2.56-4.00)  | 3.20 (2.56-4.00)  | 3.13 (2.64-3.99)  | 0.936  |
| Platelet, 10 <sup>9</sup> /L   | 223 (179-285)     | 223 (179-287)     | 223 (176-275)     | 0.771  |
| <b>Inpatient days</b>          | 18±8              | 17±8              | 19±10             | 0.002* |

---

**Abbreviations:** SOFA, sequential organ failure assessment; BMI, body mass index; CRD, chronic respiratory disease; CHD, chronic heart disease; WBC, White blood cell; HCRP, Hypersensitive c-reactive protein; NT-proBNP, N-terminal pro brain natriuretic peptide; CK-MB, Creatine kinase-MB. \*  $P < 0.05$

**Supplementary Table S3. Risk factors associated with the occurrence of sequelae.**

|                                                  | <b>Univariable OR<br/>(95%CI)</b> | <b>P Value</b> | <b>Multivariable OR<br/>(95%CI)</b> | <b>P Value</b> |
|--------------------------------------------------|-----------------------------------|----------------|-------------------------------------|----------------|
| <b>Demographics and clinical characteristics</b> |                                   |                |                                     |                |
| Age, year                                        | 1.01 (1.00-1.02)                  | 0.114          | 1.0 (0.99-1.01)                     | 0.909          |
| Gender, male (vs. female)                        | 0.9 (0.6-1.3)                     | 0.416          | 0.7 (0.5-1.1)                       | 0.718          |
| Sofa score                                       | 1.0 (0.9-1.1)                     | 0.905          |                                     |                |
| BMI, kg/m <sup>2</sup>                           | 0.9 (0.7-1.1)                     | 0.303          |                                     |                |
| Severe pneumonia                                 | 2.0 (1.4-2.9)                     | <0.001*        | 1.7 (1.1-2.6)                       | 0.026*         |
| <b>Comorbidities present (vs. not present)</b>   |                                   |                |                                     |                |
| Hypertension                                     | 1.0 (0.7-1.5)                     | 0.956          |                                     |                |
| Diabetes                                         | 0.8 (0.4-1.6)                     | 0.551          |                                     |                |
| CRD                                              | 1.2 (0.6-2.7)                     | 0.581          |                                     |                |
| CHD                                              | 0.4 (0.1-1.2)                     | 0.091          |                                     |                |
| Tumor                                            | 0.7 (0.2-2.4)                     | 0.552          |                                     |                |
| Arrhythmia                                       | 0.8 (0.2-3.8)                     | 0.797          |                                     |                |
| <b>Laboratory findings on admission</b>          |                                   |                |                                     |                |
| WBC, 10 <sup>9</sup> /L                          | 1.1 (1.0-1.2)                     | 0.017*         | 1.08 (0.99-1.17)                    | 0.079          |
| Lymphocyte, 10 <sup>9</sup> /L                   | 0.9 (0.6-1.3)                     | 0.533          |                                     |                |
| HCRP, mg/L                                       | 1.004 (1.001-1.007)               | 0.015*         | 1.002 (0.998-1.006)                 | 0.332          |
| CK-MB, U/L                                       | 1.00 (0.98-1.03)                  | 0.835          |                                     |                |

|                              |                     |        |                  |        |
|------------------------------|---------------------|--------|------------------|--------|
| D-dimer, mg/L                | 1.07 (1.00-1.14)    | 0.043* | 1.03 (0.97-1.10) | 0.348  |
| Fibrinogen, g/L              | 1.1 (0.9-1.2)       | 0.343  |                  |        |
| Platelet, 10 <sup>9</sup> /L | 1.002 (0.999-1.004) | 0.181  |                  |        |
| <b>Inpatient days</b>        | 1.03 (1.01-1.06)    | 0.003* | 1.03 (1.00-1.05) | 0.041* |

---

**Abbreviations:** SOFA, sequential organ failure assessment; BMI, body mass index; CRD, chronic respiratory disease; CHD, chronic heart disease; WBC, White blood cell; HCRP, Hypersensitive c-reactive protein; NT-proBNP, N-terminal pro brain natriuretic peptide; CK-MB, Creatine kinase-MB. \*  $P < 0.05$

**Supplementary Table S4. Factors associated with impaired DLCO in univariable and multivariable analysis.**

|                                                  | <b>Univariable OR<br/>(95%CI)</b> | <b>P Value</b> | <b>Multivariable OR<br/>(95%CI)</b> | <b>P Value</b> |
|--------------------------------------------------|-----------------------------------|----------------|-------------------------------------|----------------|
| <b>Demographics and clinical characteristics</b> |                                   |                |                                     |                |
| Age, year                                        | 1.01 (0.98-1.05)                  | 0.455          | 0.99(0.95-1.03)                     | 0.721          |
| Male (vs. female)                                | 2.1 (0.8-5.2)                     | 0.113          |                                     |                |
| Sofa score                                       | 1.3 (0.9-1.8)                     | 0.160          |                                     |                |
| BMI, kg/m <sup>2</sup>                           | 1.0 (0.9-1.2)                     | 0.976          |                                     |                |
| Severe pneumonia                                 | 2.9 (1.2-7.3)                     | 0.020*         |                                     |                |
| Padua score                                      | 1.2 (1.0-1.5)                     | 0.055          |                                     |                |
| <b>Comorbidities present (vs. not present)</b>   |                                   |                |                                     |                |
| Hypertension                                     | 1.5 (0.5-3.9)                     | 0.457          |                                     |                |
| Diabetes                                         | 0.3 (0.1-1.7)                     | 0.171          |                                     |                |
| Chronic respiratory disease                      | 1.3 (0.2-8.1)                     | 0.793          |                                     |                |
| Tumor                                            | 0.8 (0.1-13.9)                    | 0.901          |                                     |                |
| <b>Laboratory findings on admission</b>          |                                   |                |                                     |                |
| WBC, 10 <sup>9</sup> /L                          | 1.0(0.8-1.2)                      | 0.752          |                                     |                |
| Lymphocyte, 10 <sup>9</sup> /L                   | 0.5(0.2-1.3)                      | 0.137          |                                     |                |
| HCRP, mg/L                                       | 1.01(1.00-1.01)                   | 0.157          |                                     |                |
| CK-MB, U/L                                       | 1.1(1.0-1.2)                      | 0.155          |                                     |                |
| D-dimer, mg/L                                    | 1.1(0.9-1.2)                      | 0.467          |                                     |                |

|                                                 |                 |         |                |        |
|-------------------------------------------------|-----------------|---------|----------------|--------|
| Fibrinogen, g/L                                 | 0.9(0.6-1.2)    | 0.388   |                |        |
| Platelet, 10 <sup>9</sup> /L                    | 0.99(0.99-1.00) | 0.055   |                |        |
| <b>Treatments during hospitalization, N (%)</b> |                 |         |                |        |
| Corticosteroids                                 | 1.3(0.4-3.7)    | 0.675   |                |        |
| HFNC                                            | 1.4(0.4-4.8)    | 0.570   |                |        |
| Noninvasive MV                                  | 1.7(0.7-4.3)    | 0.234   |                |        |
| <b>ARDS</b>                                     | 3.6(1.2-10.3)   | 0.019*  | 4.6(1.4-15.5)  | 0.014* |
| <b>TSS &gt; 10.5 at admission</b>               | 7.7(2.5-23.4)   | <0.001* | 10.4(2.5-44.1) | 0.001* |
| <b>MPA diameter at admission</b>                | 1.2(1.0-1.4)    | 0.027*  | 1.0(0.8-1.2)   | 0.838  |

---

**Abbreviations:** SOFA, sequential organ failure assessment; BMI, body mass index; WBC, White blood cell; HCRP, Hypersensitive c-reactive protein; NT-proBNP, N-terminal pro brain natriuretic peptide; CK-MB, Creatine kinase-MB; HFNC, Transnasal Hyperflow Oxygen Therapy; MV, mechanical ventilation; ARDS, Acute Respiratory Distress Syndrome; TSS, total severity score. MPA, main pulmonary artery. \*  $P < 0.05$



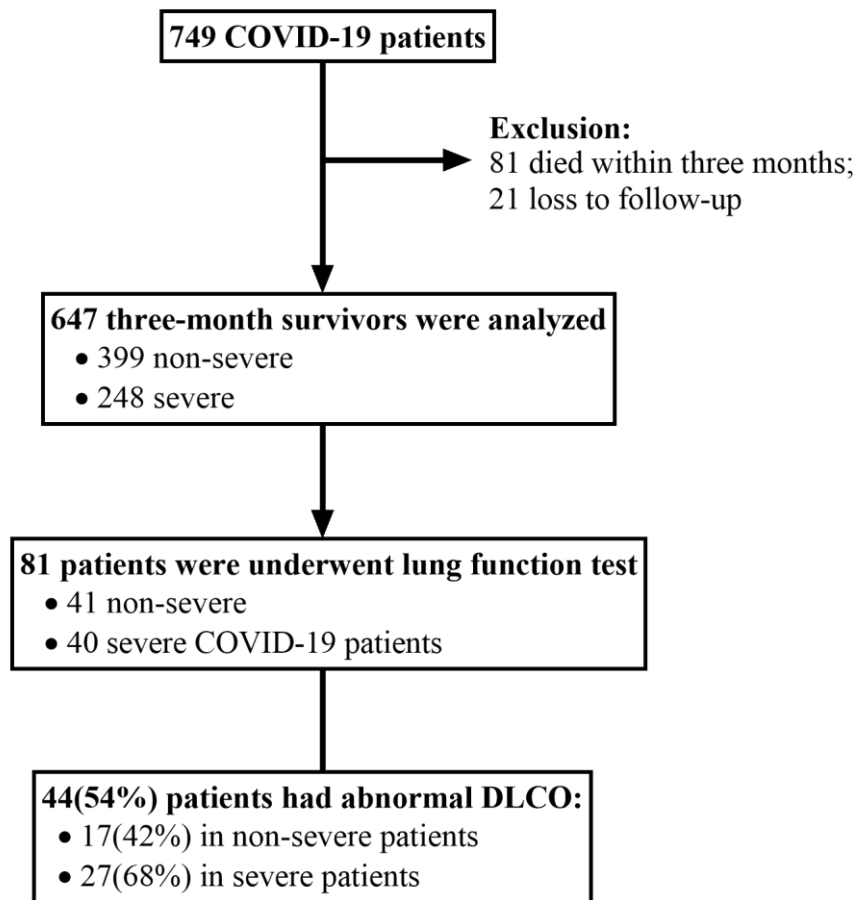

**Supplementary Figure S1. The flow chat of studied COVID-19 patient**
