# Supplementary material
Source: HighWire-hosted journal article supplement (https://erj.ersjournals.com/content/58/1/2003677)
Supplement: inline-supplementary-material-2 [file inline-supplementary-material-2.pdf]

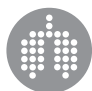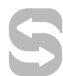

SHAREABLE PDF

# Diffusion capacity abnormalities for carbon monoxide in patients with COVID-19 at 3-month follow-up

Wei Qin<sup>1,11</sup>, Shi Chen<sup>1,11</sup>, Yunxia Zhang<sup>2,3,4,11</sup>, Fen Dong<sup>5,11</sup>, Zhu Zhang<sup>2,3,4,11</sup>, Bingzhu Hu<sup>1</sup>, Ziyang Zhu<sup>1</sup>, Fajiu Li<sup>1</sup>, Xiaojiang Wang<sup>1</sup>, Yimin Wang<sup>2,3,4</sup>, Kaiyuan Zhen<sup>2,3,4</sup>, Jing Wang<sup>6</sup>, YuLei Wan<sup>7</sup>, Hongbo Li<sup>7</sup>, Ismail Elalamy<sup>8,9</sup>, Chenghong Li<sup>1,12</sup>, Zhenguo Zhai<sup>2,3,4,12</sup> and Chen Wang<sup>2,3,4,10</sup>

**Affiliations:** <sup>1</sup>Dept of Pulmonary and Critical Care Medicine, Affiliated Hospital of Jiangnan University, Wuhan, China. <sup>2</sup>Dept of Pulmonary and Critical Care Medicine, Center of Respiratory Medicine, China–Japan Friendship Hospital, Beijing, China. <sup>3</sup>Institute of Respiratory Medicine, Chinese Academy of Medical Sciences, Beijing, China. <sup>4</sup>National Clinical Research Center for Respiratory Diseases, Beijing, China. <sup>5</sup>Institute of Clinical Medical Sciences, China–Japan Friendship Hospital, Beijing, China. <sup>6</sup>Institute of Basic Research, Chinese Academy of Medical Sciences, Beijing, China. <sup>7</sup>Dept of Radiology, Affiliated Hospital of Jiangnan University, Wuhan, China. <sup>8</sup>Hematology and Thrombosis Center, Tenon University Hospital, INSERM UMRS 938, Sorbonne University, Paris, France. <sup>9</sup>The First I.M. Sechenov Moscow State Medical University, Moscow, Russia. <sup>10</sup>Peking Union Medical College, Chinese Academy of Medical Sciences, Beijing, China. <sup>11</sup>These authors contributed equally as co-first authors. <sup>12</sup>These authors contributed equally to this article as lead authors and supervised the work.

**Correspondence:** Zhenguo Zhai, Institute of Respiratory Medicine, Chinese Academy of Medical Sciences, 2 East Yinghua Road, 100029 Beijing, P.R. China. E-mail: zhaizhenguo2011@126.com

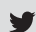

@ERSpublications

COVID-19 patients present with impaired  $D_{LCO}$  at 90 days after discharge, particularly severe patients. Chest CT TSS >10.5 and ARDS occurrence are associated with impaired  $D_{LCO}$ . Pulmonary interstitial damage may contribute to the impaired  $D_{LCO}$ . <https://bit.ly/2JevUtm>

**Cite this article as:** Qin W, Chen S, Zhang Y, *et al*. Diffusion capacity abnormalities for carbon monoxide in patients with COVID-19 at 3-month follow-up. *Eur Respir J* 2021; 0: 2003677 [<https://doi.org/10.1183/13993003.03677-2020>].

This single-page version can be shared freely online.

## ABSTRACT

**Objective:** To evaluate pulmonary function and clinical symptoms in coronavirus disease 2019 (COVID-19) survivors within 3 months after hospital discharge, and to identify risk factors associated with impaired lung function.

**Methods and material:** COVID-19 patients were prospectively followed-up with pulmonary function tests and clinical characteristics for 3 months following discharge from a hospital in Wuhan, China between January and February 2020.

**Results:** 647 patients were included. 87 (13%) patients presented with weakness, 63 (10%) with palpitations and 56 (9%) with dyspnoea. The prevalence of each of the three symptoms were markedly higher in severe patients than nonsevere patients (19% *versus* 10% for weakness,  $p=0.003$ ; 14% *versus* 7% for palpitations,  $p=0.007$ ; 12% *versus* 7% for dyspnoea,  $p=0.014$ ). Results of multivariable regression showed increased odds of ongoing symptoms among severe patients (OR 1.7, 95% CI 1.1–2.6;  $p=0.026$ ) or patients with longer hospital stays (OR 1.03, 95% CI 1.00–1.05;  $p=0.041$ ). Pulmonary function test results were available for 81 patients, including 41 nonsevere and 40 severe patients. In this subgroup, 44 (54%) patients manifested abnormal diffusing capacity of the lung for carbon monoxide ( $D_{LCO}$ ) (68% severe *versus* 42% nonsevere patients,  $p=0.019$ ). Chest computed tomography (CT) total severity score >10.5 (OR

10.4, 95% CI 2.5–44.1;  $p=0.001$ ) on admission and acute respiratory distress syndrome (ARDS) (OR 4.6, 95% CI 1.4–15.5;  $p=0.014$ ) were significantly associated with impaired  $D_{LCO}$ . Pulmonary interstitial damage may be associated with abnormal  $D_{LCO}$ .

**Conclusion:** Pulmonary function, particularly  $D_{LCO}$ , declined in COVID-19 survivors. This decrease was associated with total severity score of chest CT  $>10.5$  and ARDS occurrence. Pulmonary interstitial damage might contribute to the impaired  $D_{LCO}$ .
